# Supplementary material
Source: publisher figshare collection journal article supplement (https://brill.figshare.com/ndownloader/files/31054642)
Supplement: Supplementary file 1 [file 31054642]

| Esteban et al. (2004) | Features / Fossil species | *Cedroxylon shaktnaense* comb. nov. | 2. *Abies* sect. *Nobilis*  Engelm. _ Type: *Abies procera*  Rehder (microscopic  observation) | *A.*  *magnifica*  A.  Murray |
| --- | --- | --- | --- | --- |
| AT1 | Well‐defined growth  rings | + | + | + |
| AT4 | Axial tracheids of polygonal section | + | + | + |
| AT6 | Intercellular spaces  present | + | ‐ | ‐ |
| AT8 | Spiral thickenings present,  but not in all the axial tracheids | ‐ | ‐ | ‐ |
| AT9 | Bordered pits present on  the tangential walls of the axial tracheids | + | + | + |
| AT10 | Uniseriate bordered pits  on the radial walls of the axial tracheids | + | + | + |
| AT11 | Biseriate bordered pits on  the radial walls  of the axial tracheids | (occasionally) | ‐ | ‐ |
| AT19 | Bars of Sanio | + | ‐ | ‐ |
| AT20 | Trabecula | ‐ | + | ‐ |
| AT21 | Crystals present in axial tracheids | ‐ | ‐ | ‐ |
| P1 | Axial parenchyma  absent or scarce | + | + | + |
| P2 | Axial parenchyma with smooth transverse  walls | + | ‐ | ‐ |
| P3 | Axial parenchyma with  nodular transverse walls | + | ‐ | + |
| P4 | Axial parenchyma with  crystals | ‐ | ‐ | + |
| P5 | Axial parenchyma with resin | ‐ | ‐ | ‐ |
| P6 | Diffuse axial parenchyma present | + | ‐ | + |
| P8 | Terminal axial parenchyma present | + / ‐ | ‐ | ‐ |
| R1 | Uniseriate rays | + | + | + |
| R2 | Partially biseriate rays | (in less than 10% of  the total number of the rays) | + | ‐ |
| R4 | Ray height from 1 to 15  cells | + | + | + |
| R5 | Ray height from 16 to 30 cells | + | + | ‐ |
| R7 | Number of rays per  mm2 <70 | + | + | ‐ |
| R8 | Number of rays per mm2 between 70 and 100 | ‐ | ‐ | + |
| R9 | Number of rays per  mm2 >70 | ‐ | ‐ | ‐ |
| R17 | Ray parenchyma with  nodular axial walls | + | + | + |
| R19 | Ray parenchyma with  pitted horizontal walls | + | + | + |
| R20 | Ray parenchyma with crystals | ‐ | ‐ | ‐ |
| R23 | Piceoid cross field pits | + | + | + |
| R24 | Cupressoid cross field  pits | ‐ | ‐ | ‐ |
| R25 | Taxodioid cross field pits | + | ‐ | ‐ |
| R26 | 1 to 2 pits per cross  field | + | + | + |
| R27 | 3 to 4 pits per cross  field | ‐ | ‐ | ‐ |
| RC1 | Resin canals absent | + | + | + |
| RC3 | Thick‐walled epithelial cell resin canals | + | ‐ | ‐ |
| RC4 | Number of epithelial cells in the axial resin  canals <9 | + | ‐ | ‐ |
| RC5 | Number of epithelial cells  in the axial resin canals > 9 | + | ‐ | ‐ |
